# Supplementary material for: [Co(NH3)6]3[Cu4(OH)(CO3)8]·2H2O – a new carbonato-copper(ii) anion stabilized by extensive hydrogen bonding
Source: Royal Society of Chemistry journal article supplement (doi:10.1039/b316925a), 2004-01-01
Supplement: b316925a.doc [file b316925a.doc]

[Co(NH3)6]3[Cu4(OH)(CO3)8].2H2O - A New Carbonato-Copper(II) Anion Stabilized by Extensive Hydrogen Bonding

Brendan F. Abrahams, Marissa G. Haywood and Richard Robson*

School of Chemistry, University of Melbourne, Victoria 3010, Australia Fax: +61 3 9347 5180; Tel: +61 3 8344 6469; E-mail: r.robson@unimelb.edu.au

Synthesis of [Co(NH3)6]3[Cu4(OH)(CO3)8].2H2O

Cu(NO3)2.6H2O (500mg, 2.1 mmol) was dissolved in an aqueous saturated solution of K2CO3/KHCO3 (2.4 and 1.25 M respectively, 10 ml) and added to Co(NH3)6Cl3 (40 mg, 1.55 mmol) in water (8 ml) to form a deep green solution. Green crystals of [Co(NH3)6]3[Cu4(OH)(CO3)8].2H2O began to form after several hours. The crystals were filtererd off, washed with water and dried in air (490 mg, 0.394 mmol, 25% yield).
